# Supplementary material for: Superflexible C68-graphyne as a promising anode material for lithium-ion batteries
Source: Royal Society of Chemistry journal article supplement (doi:10.1039/c9ta05955e), 2019-01-01
Supplement: c9ta05955e1.pdf [file c9ta05955e1.pdf]

## Supplementary Materials for

# Superflexible C<sub>68</sub>-graphyne as promising anode materials for lithium-ion batteries

Bozhao Wu<sup>1</sup>, Xiangzheng Jia<sup>1</sup>, Yanlei Wang<sup>2</sup>, Jinxi Hu<sup>1</sup>, Enlai Gao<sup>1\*</sup> and Ze Liu<sup>1\*</sup>

<sup>1</sup>Department of Engineering Mechanics, School of Civil Engineering, Wuhan University, Wuhan, Hubei 430072, China.

<sup>2</sup>Beijing Key Laboratory of Ionic Liquids Clean Process, CAS Key Laboratory of Green Process and Engineering, Institute of Process Engineering, Chinese Academy of Sciences, Beijing 100190, China.

\*Corresponding authors. Email: [enlaigao@whu.edu.cn](mailto:enlaigao@whu.edu.cn); [ze.liu@whu.edu.cn](mailto:ze.liu@whu.edu.cn)

The Supporting Materials contain

- Supplementary Figures S1-S9.
- Supplementary Tables S1-S2.

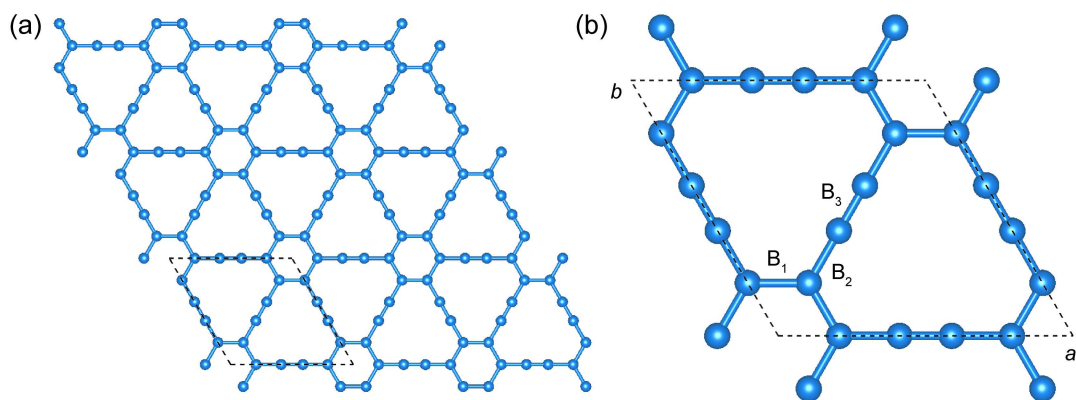

**Fig. S1** (a) Schematic diagram of  $\gamma$ -GY and (b) its primitive cell, different bonds are marked as  $B_{1-3}$ .

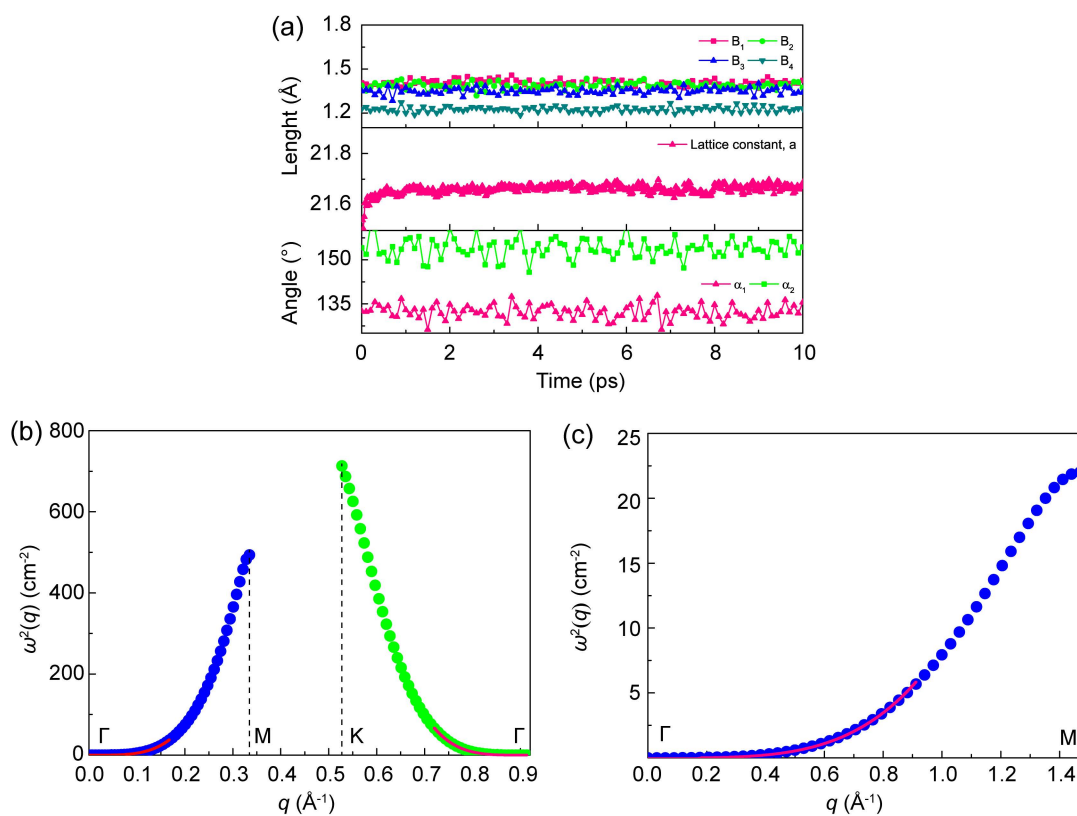

**Fig. S2** (a) The fluctuation of bonds, angles and lattice constant of  $C_{68}$ -GY during the AIMD simulations. The quadratic dispersion of flexural phonon mode ZA in (b)  $C_{68}$ -GY and (c) graphene, in which the red lines denote the fitting curves.

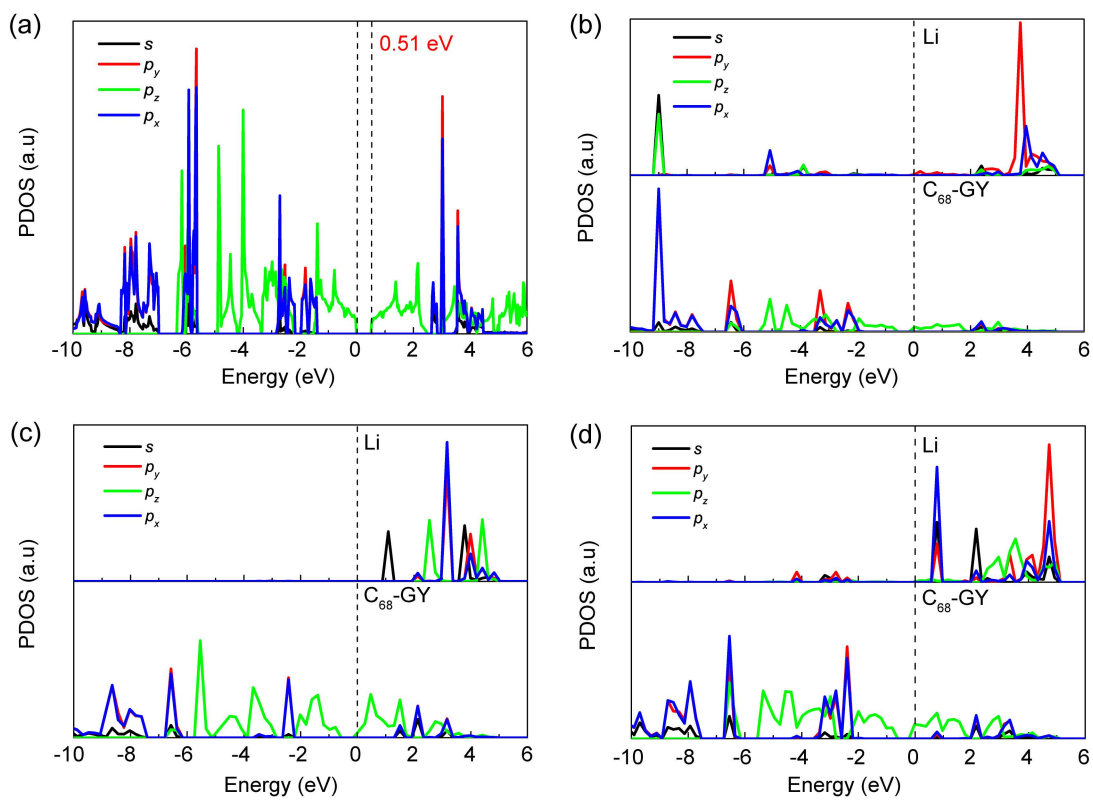

**Fig. S3** Projected density of state (PDOS) of (a) pristine  $C_{68}$ -GY with an adsorbed Li on Site (b) S1, (c) S3 and (d) S4.

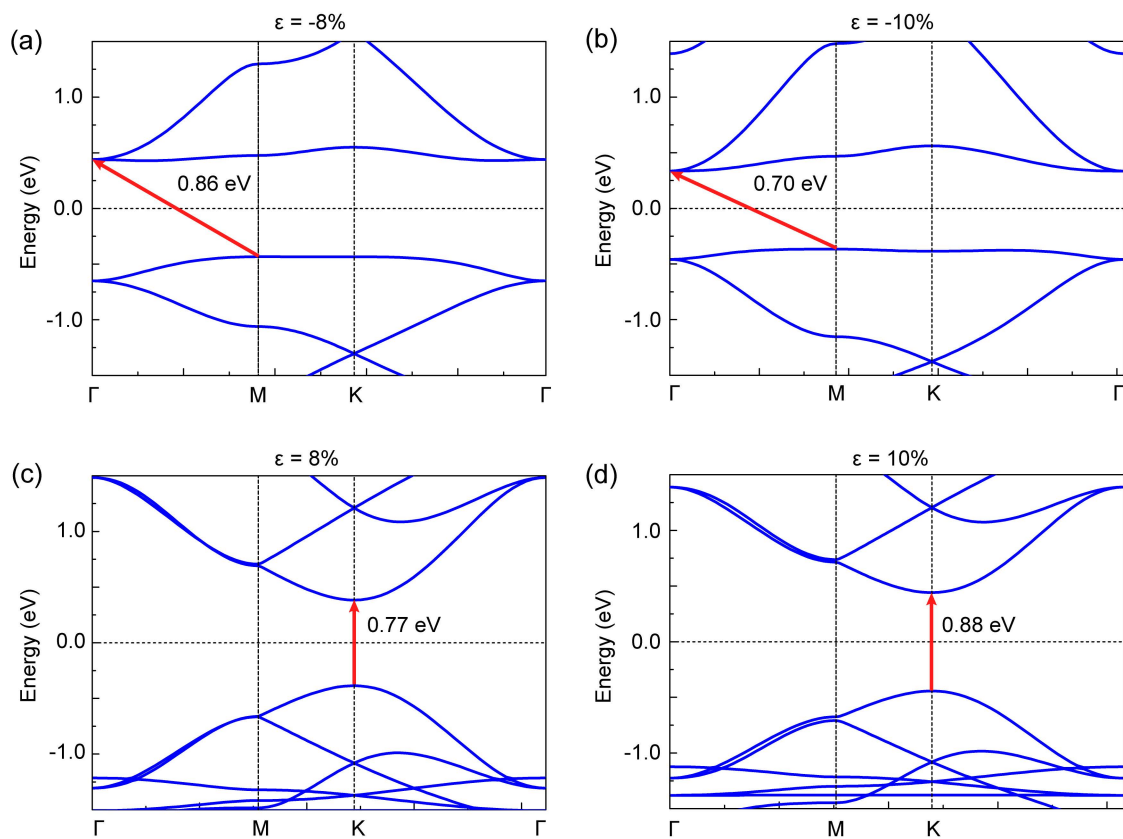

**Fig. S4** Effect of biaxial strain ( $\epsilon$ ) on the band structures of  $C_{68}$ -GY.

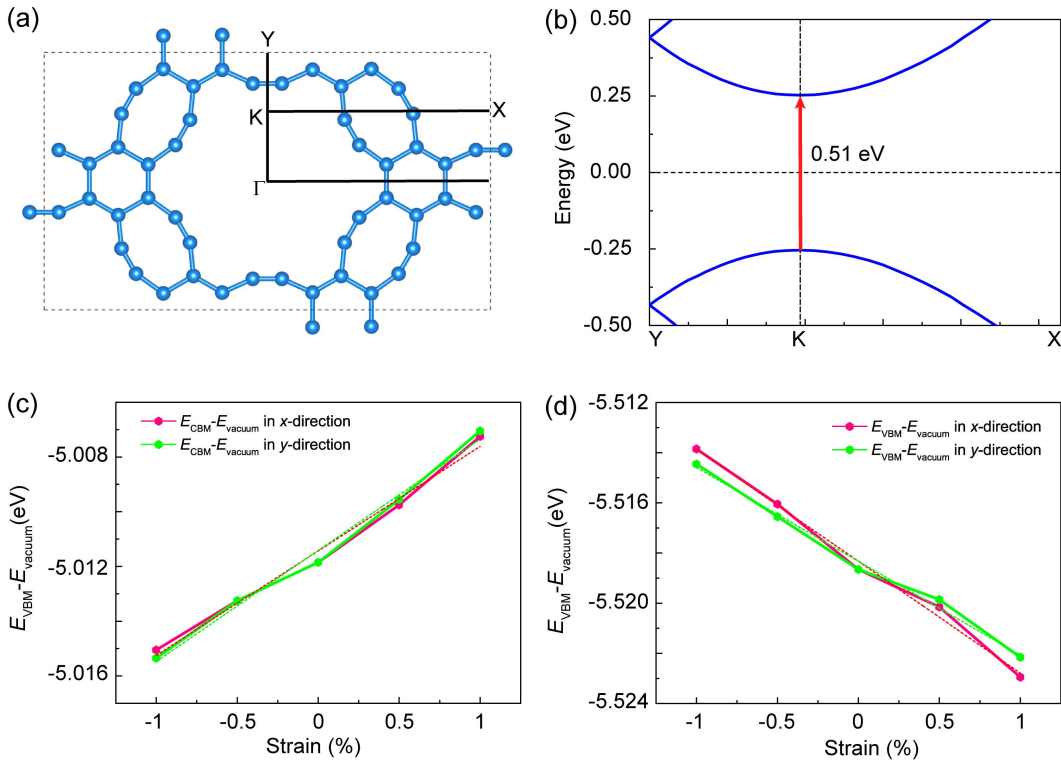

**Fig. S5** (a) The K-path in the Brillouin zone for the calculation of carrier mobilities. (b) The calculated band structure along Y-K-X path at PBE functional level. Band energy shift of (c) CBM and (d) VBM under the strain along  $x$ - and  $y$ -direction. The term  $E_1$  is determined by using  $E_1 = \Delta E / \varepsilon$  to fit the curves in (c) and (d). The dashed lines belong to the fitting lines with respect to  $x$ - and  $y$ -direction, respectively.

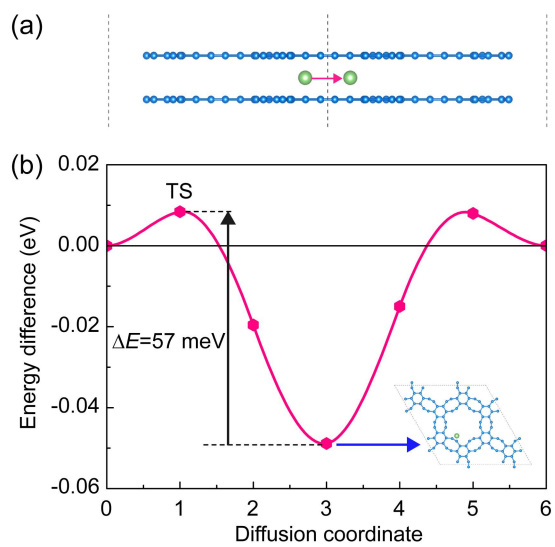

**Fig. S6** (a) Schematics of the diffusion path in bilayer  $C_{68}$ -graphyne along diffusion path of P1 (side view); (b) the diffusion barrier profile.

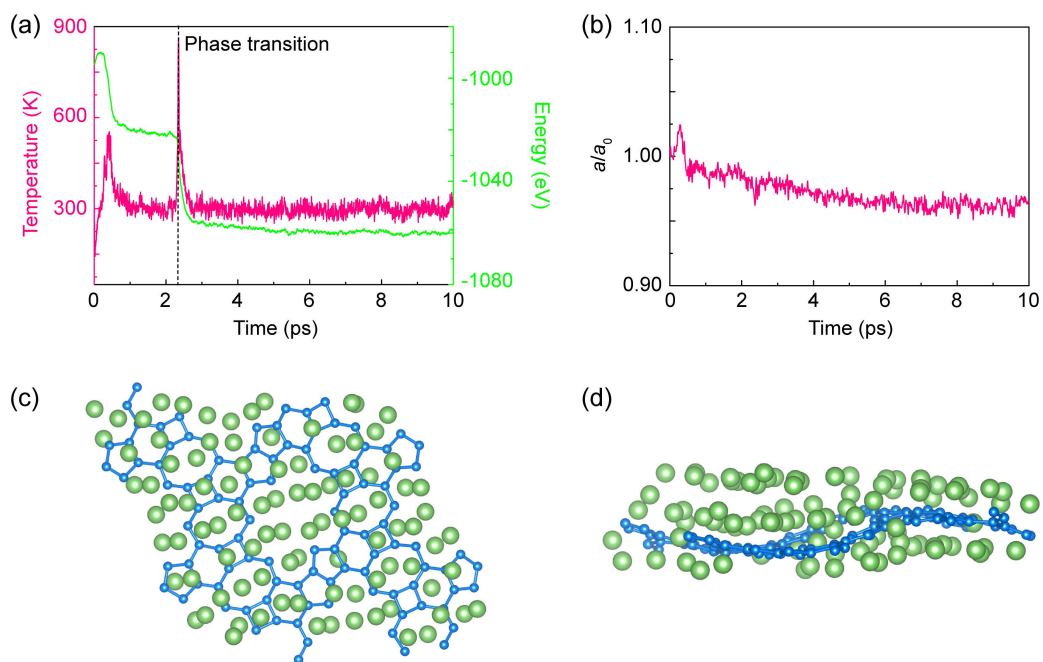

**Fig. S7** The fluctuations of (a) temperature and energy in the AIMD simulations of LiC, as well as (b) the lattice changes,  $a/a_0$ ; (c) Top and (d) side views of the snapshots of LiC taken from AIMD simulations. The green and blue spheres represent Li and C atoms, respectively.



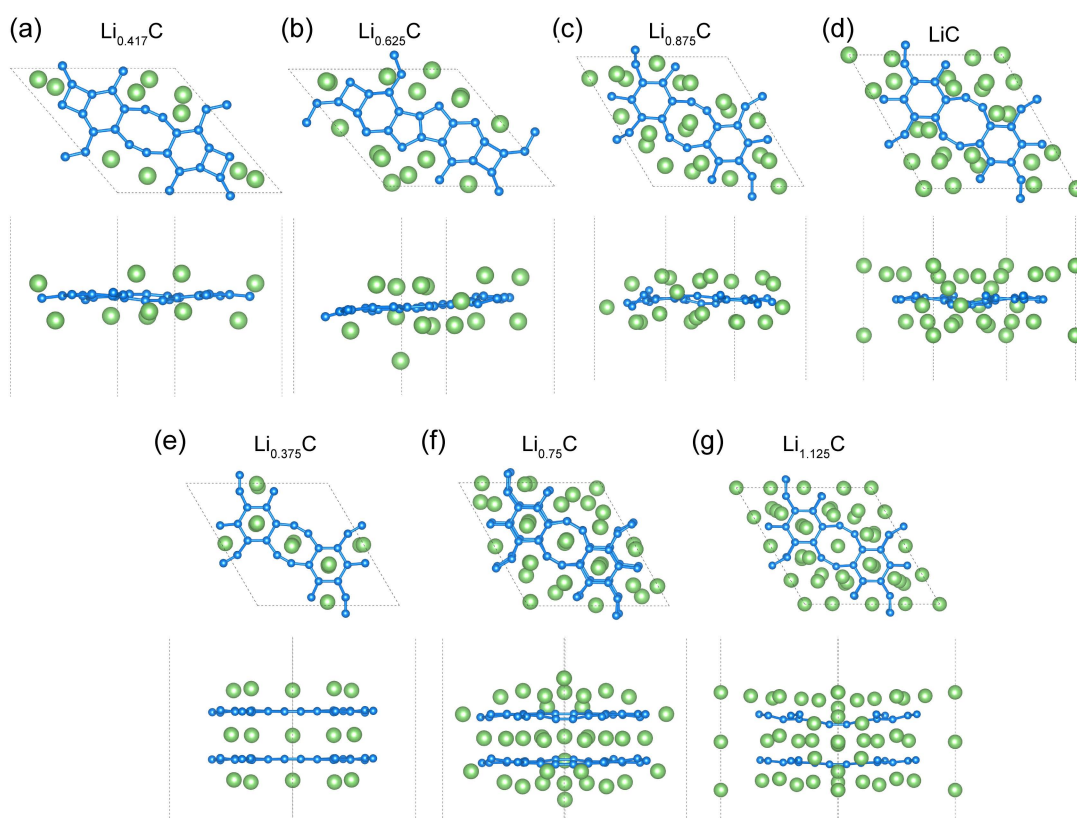

**Fig. S8** (a-d) Top and side views of the intermediate configurations with different Li ion concentrations along the minimum formation energy path. (e-g) The considered configurations with varying Li concentrations intercalated in bilayer C<sub>68</sub>-GY.

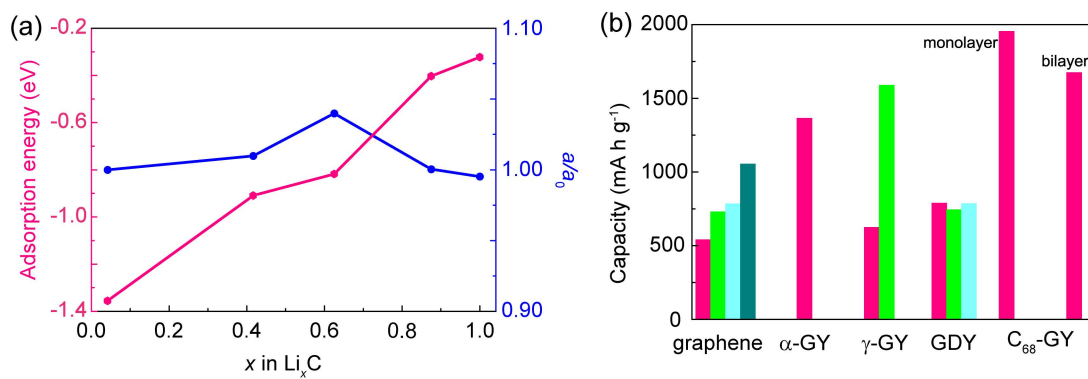

**Fig. S9** (a) The calculated adsorption energy and lattice change profiles along the minimum energy path of formation energies as shown as green points in **Fig. 6a**; (b) The specific capacity ( $C$ ) of C<sub>68</sub>-GY as anode materials for LIBs, and the comparison with other typical carbon allotropes. The data for graphene,  $\alpha$ -GY,  $\gamma$ -GY and GDY are obtained from **Refs. 1-7**.

**Table S1** The calculated in-plane stiffness  $S$ , Poisson ratio  $\nu$ , tensile strengths  $\sigma_s$  and strain to failure  $\varepsilon_s$  of C<sub>68</sub>-GY, and the comparison with other typical carbon allotropes.

| Materials           | $S$ (N m <sup>-1</sup> ) |                     | $\nu$               |                     | $\sigma_s$ (N m <sup>-1</sup> ) |                    | $\varepsilon_s$     |                     | $D$ (eV)                  |
|---------------------|--------------------------|---------------------|---------------------|---------------------|---------------------------------|--------------------|---------------------|---------------------|---------------------------|
|                     | $S_x$                    | $S_y$               | $\nu_x$             | $\nu_y$             | $\sigma_{sx}$                   | $\sigma_{sy}$      | $\varepsilon_{sx}$  | $\varepsilon_{sy}$  |                           |
| C <sub>68</sub> -GY | 49.4                     | 51.7                | 0.713               | 0.714               | 21.7                            | 14.7               | 0.32                | 0.20                | 0.50                      |
| Graphene            | 350 <sup>8</sup>         | 350 <sup>8</sup>    | 0.186 <sup>8</sup>  | 0.186 <sup>8</sup>  | 36.7 <sup>8</sup>               | 40.4 <sup>8</sup>  | 0.194 <sup>8</sup>  | 0.266 <sup>8</sup>  | 1.44~1.46 <sup>9,10</sup> |
| $\alpha$ -GY        | 21.98 <sup>11</sup>      | 21.98 <sup>11</sup> | 0.87 <sup>11</sup>  | 0.87 <sup>11</sup>  | 12.4 <sup>12</sup>              | 11.0 <sup>12</sup> | 0.178 <sup>12</sup> | 0.156 <sup>12</sup> | -                         |
| $\beta$ -GY         | 73.07 <sup>11</sup>      | 73.07 <sup>11</sup> | 0.67 <sup>11</sup>  | 0.67 <sup>11</sup>  | 15.7 <sup>12</sup>              | 12.9 <sup>12</sup> | 0.162 <sup>12</sup> | 0.130 <sup>12</sup> | -                         |
| $\gamma$ -GY        | 162 <sup>13</sup>        | 162 <sup>13</sup>   | 0.429 <sup>13</sup> | 0.429 <sup>13</sup> | 15.4 <sup>14</sup>              | 34.4 <sup>14</sup> | 0.08 <sup>14</sup>  | 0.13 <sup>14</sup>  | 2.69 <sup>14</sup>        |
| GDY                 | 123.1 <sup>15</sup>      | 123.1 <sup>15</sup> | 0.446 <sup>15</sup> | 0.446 <sup>15</sup> | -                               | -                  | -                   | -                   | -                         |
| Graph-3-yne         | 101.8 <sup>15</sup>      | 101.8 <sup>15</sup> | 0.436 <sup>15</sup> | 0.436 <sup>15</sup> | -                               | -                  | -                   | -                   | -                         |
| Graph-4-yne         | 87.7 <sup>15</sup>       | 87.7 <sup>15</sup>  | 0.432 <sup>15</sup> | 0.432 <sup>15</sup> | -                               | -                  | -                   | -                   | -                         |

**Table S2** The calculated effective masses for electrons ( $m_e^*$ ) and holes ( $m_h^*$ ) in the direct band structures of C<sub>68</sub>-GY at PBE level with applying various biaxial strain.

| Biaxial strain (%) | $m_e^* / m_0$ (K-M) | $m_e^* / m_0$ (K- $\Gamma$ ) | $m_h^* / m_0$ (K-M) | $m_h^* / m_0$ (K- $\Gamma$ ) |
|--------------------|---------------------|------------------------------|---------------------|------------------------------|
| -6                 | 0.641               | 0.298                        | -0.575              | -0.296                       |
| -4                 | 0.556               | 0.278                        | -0.685              | -0.293                       |
| -2                 | 0.712               | 0.271                        | -0.864              | -0.294                       |
| -1                 | 0.325               | 0.199                        | -0.342              | -0.209                       |
| -0.5               | 0.325               | 0.199                        | -0.343              | -0.210                       |
| 0                  | 0.326               | 0.200                        | -0.345              | -0.211                       |
| 0.5                | 0.326               | 0.200                        | -0.347              | -0.212                       |
| 1                  | 0.327               | 0.201                        | -0.350              | -0.214                       |
| 2                  | 0.329               | 0.203                        | -0.355              | -0.218                       |
| 4                  | 0.336               | 0.210                        | -0.368              | -0.228                       |
| 6                  | 0.347               | 0.221                        | -0.386              | -0.243                       |
| 8                  | 0.364               | 0.238                        | -0.410              | -0.265                       |
| 10                 | 0.391               | 0.266                        | -0.448              | -0.300                       |

## References

1. E. Yoo, J. Kim, E. Hosono, H.-s. Zhou, T. Kudo and I. Honma, *Nano letters*, 2008, **8**, 2277-2282.
2. D. Pan, S. Wang, B. Zhao, M. Wu, H. Zhang, Y. Wang and Z. Jiao, *Chemistry of Materials*, 2009, **21**, 3136-3142.
3. H. J. Hwang, J. Koo, M. Park, N. Park, Y. Kwon and H. Lee, *The Journal of Physical Chemistry C*, 2013, **117**, 6919-6923.
4. K. Srinivasu and S. K. Ghosh, *The Journal of Physical Chemistry C*, 2012, **116**, 5951-5956.
5. C. Sun and D. J. Searles, *The Journal of Physical Chemistry C*, 2012, **116**, 26222-26226.
6. H. Zhang, Y. Xia, H. Bu, X. Wang, M. Zhang, Y. Luo and M. Zhao, *Journal of Applied Physics*, 2013, **113**, 044309.
7. S. Zhang, H. Du, J. He, C. Huang, H. Liu, G. Cui, Y. and Y. Li, *ACS Applied Materials & Interfaces*, 2016, **8**, 8467-8473.
8. F. Liu, P. Ming and J. Li, *Physical Review B*, 2007, **76**, 064120.
9. K. N. Kudin, G. E. Scuseria and B. I. Yakobson, *Physical Review B*, 2001, **64**, 235406.
10. Y. Wei, B. Wang, J. Wu, R. Yang and M. L. Dunn, *Nano Letters*, 2013, **13**, 26-30.
11. A. R. Puigdollers, G. Alonso and P. J. C. Gamallo, *Carbon*, 2016, **96**, 879-887.
12. Y. Zhang, Q. Pei and C. Wang, *Applied Physics Letters*, 2012, **101**, 081909.
13. Q. Peng, W. Ji and S. De, *Physical Chemistry Chemical Physics*, 2012, **14**, 13385-13391.
14. S. W. Cranford and M. J. Buehler, *Carbon*, 2011, **49**, 4111-4121.
15. Q. Yue, S. Chang, J. Kang, S. Qin and J. Li, *The Journal of Physical Chemistry C*, 2013, **117**, 14804-14811.
